# Supplementary material for: The seven-step, one-pot regioselective synthesis of biologically important 3-aryllawsones: scope and applications
Source: Royal Society of Chemistry journal article supplement (doi:10.1039/d2ob00438k), 2022-01-01
Supplement: d2ob00438k3.pdf [file d2ob00438k3.pdf]

## Supporting Information-III

# A Seven-step, One-pot Regioselective Synthesis of Biologically Important 3-Aryllawsones: Scope and Applications

Anugam V. Krishna and Dhevalapally B. Ramachary\*

Catalysis Laboratory, School of Chemistry, University of Hyderabad, Hyderabad-500 046, India  
Email: [ramsc@uohyd.ac.in](mailto:ramsc@uohyd.ac.in) and [ramchary.db@gmail.com](mailto:ramchary.db@gmail.com)

**General Methods:** The  $^1\text{H}$  NMR and  $^{13}\text{C}$  NMR spectra were recorded at 500 and 400 MHz and 125 and 100 MHz, respectively. The chemical shifts are reported in ppm downfield to TMS ( $\delta = 0$ ) for  $^1\text{H}$  NMR and relative to the central  $\text{CDCl}_3$  resonance ( $\delta = 77.0$ ) for  $^{13}\text{C}$  NMR. *In the  $^{13}\text{C}$  NMR spectra, the nature of the carbons (C, CH,  $\text{CH}_2$  or  $\text{CH}_3$ ) was determined by recording the DEPT-135 experiment, and is given in parentheses.* The coupling constants  $J$  are given in Hz. Column chromatography was performed using Acme's silica gel (particle size 0.063-0.200 mm). High-resolution mass spectra were recorded on micromass ESI-TOF MS. IR spectra were recorded on JASCO FT/IR-5300. Mass spectra were recorded on either VG7070H mass spectrometer using EI technique or Shimadzu-LCMS-2010 A mass spectrometer. The X-ray diffraction measurements were carried out at 298 K on an automated Enraf-Nonious MACH 3 diffractometer using graphite monochromated, Mo- $\text{K}\alpha$  ( $\lambda = 0.71073 \text{ \AA}$ ) radiation with CAD4 software or the X-ray intensity data were measured at 298 K on a Bruker SMART APEX CCD area detector system equipped with a graphite monochromator and a Mo- $\text{K}\alpha$  fine-focus sealed tube ( $\lambda = 0.71073 \text{ \AA}$ ). For thin-layer chromatography (TLC), silica gel plates Merck 60 F254 were used and compounds were visualized by irradiation with UV light and/or by treatment with a solution of *p*-anisaldehyde (23 mL), conc.  $\text{H}_2\text{SO}_4$  (35 mL), acetic acid (10 mL), and ethanol (900 mL) followed by heating.

The enantiomeric excess (*ee*) of the products **7**, **10** were determined by chiral stationary phase HPLC using a Daicel Chiralpak ID or Daicel Chiralpak AD-H column and hexane/2-propanol as the eluent. Retention times and solvent ratios are indicated in the respective entries.

Racemic ( $\pm$ )-7na:

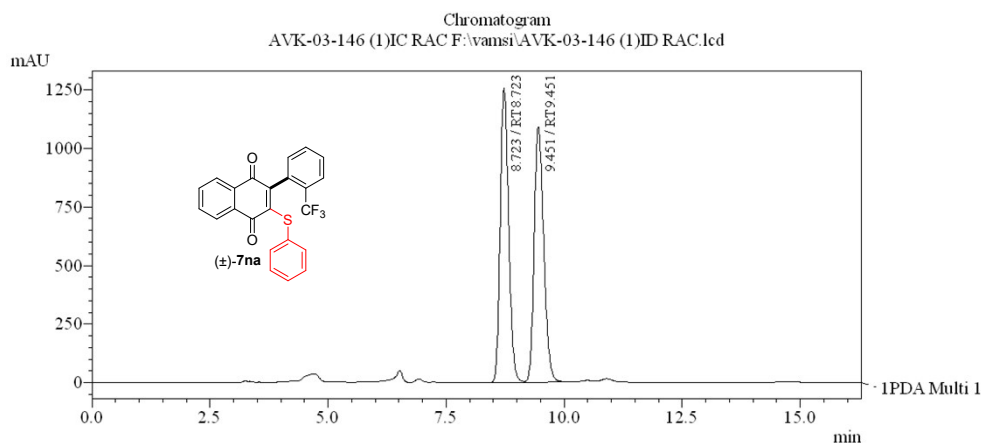

Chiralpak ID, Hexane/*i*-PrOH = 90:10, mL/Min, Flow Rate 1.0 mL/min,

| PeakTable         |         |           |          |         |         |          |
|-------------------|---------|-----------|----------|---------|---------|----------|
| PDA Ch1 254nm 4nm |         |           |          |         |         |          |
| Peak#             | Name    | Ret. Time | Area     | Height  | Area %  | Height % |
| 1                 | RT8.723 | 8.723     | 15450357 | 1256571 | 50.123  | 53.615   |
| 2                 | RT9.451 | 9.451     | 15374611 | 1087115 | 49.877  | 46.385   |
| Total             |         |           | 30824968 | 2343685 | 100.000 | 100.000  |

Chiral 7na (10% *ee*) [Table S1, entry 1]:

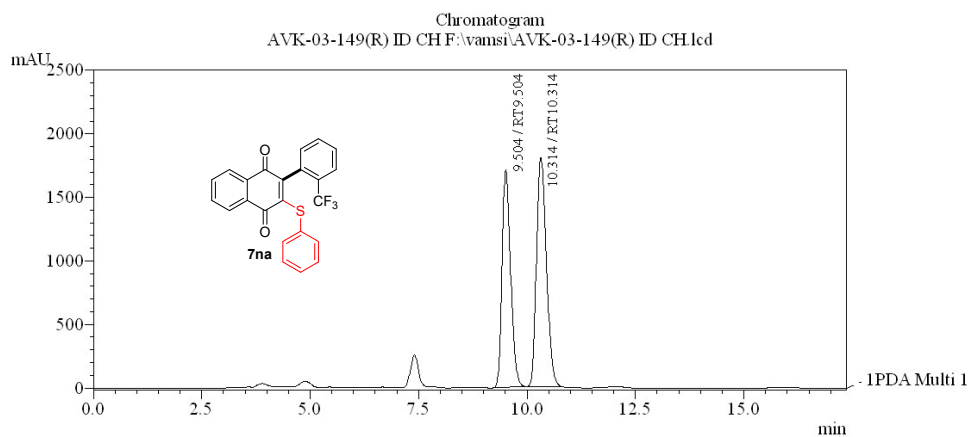

Chiralpak ID, Hexane/*i*-PrOH = 90:10, mL/Min, Flow Rate 1.0 mL/min,

| PeakTable         |          |           |          |         |         |          |
|-------------------|----------|-----------|----------|---------|---------|----------|
| PDA Ch1 254nm 4nm |          |           |          |         |         |          |
| Peak#             | Name     | Ret. Time | Area     | Height  | Area %  | Height % |
| 1                 | RT9.504  | 9.504     | 23551743 | 1710998 | 45.060  | 48.673   |
| 2                 | RT10.314 | 10.314    | 28715414 | 1804261 | 54.940  | 51.327   |
| Total             |          |           | 52267156 | 3515258 | 100.000 | 100.000  |

Chiral **7na** (1% *ee*) [Table S1, entry 2]:

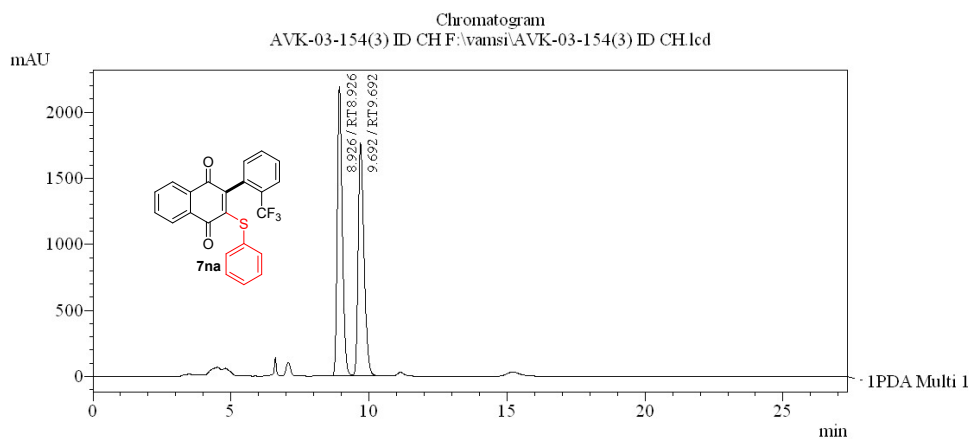

Chiralpak ID, Hexane/*i*-PrOH = 90:10, mL/Min, Flow Rate 1.0 mL/min,

| PeakTable         |         |           |          |         |         |          |
|-------------------|---------|-----------|----------|---------|---------|----------|
| PDA Ch1 254nm 4nm |         |           |          |         |         |          |
| Peak#             | Name    | Ret. Time | Area     | Height  | Area %  | Height % |
| 1                 | RT8.926 | 8.926     | 26982302 | 2191013 | 50.435  | 55.373   |
| 2                 | RT9.692 | 9.692     | 26517373 | 1765792 | 49.565  | 44.627   |
| Total             |         |           | 53499675 | 3956805 | 100.000 | 100.000  |

**7na**  
(1% *ee*)  
[Table S1, entry 3]:

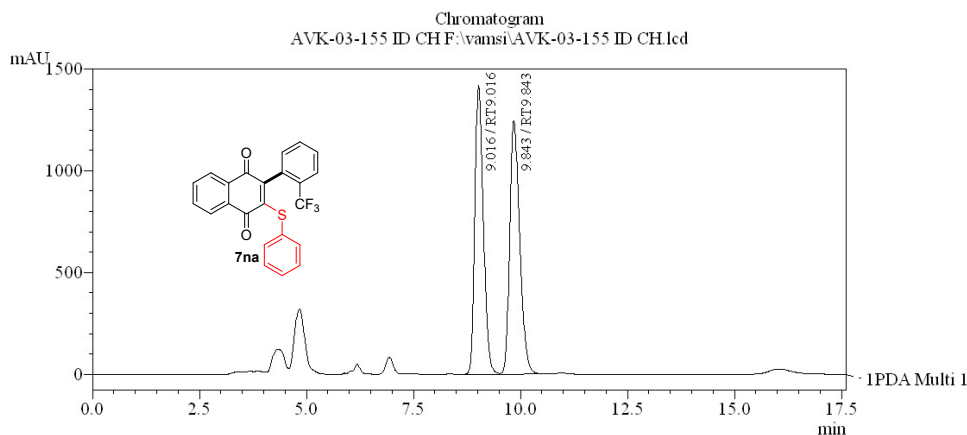

Chiralpak ID, Hexane/*i*-PrOH = 90:10, mL/Min, Flow Rate 1.0 mL/min,

| PeakTable         |         |           |          |         |         |          |
|-------------------|---------|-----------|----------|---------|---------|----------|
| PDA Ch1 254nm 4nm |         |           |          |         |         |          |
| Peak#             | Name    | Ret. Time | Area     | Height  | Area %  | Height % |
| 1                 | RT9.016 | 9.016     | 19688291 | 1418094 | 49.169  | 53.267   |
| 2                 | RT9.843 | 9.843     | 20354121 | 1244128 | 50.831  | 46.733   |
| Total             |         |           | 40042413 | 2662222 | 100.000 | 100.000  |

Chiral  
(1% *ee*)  
[Table S1, entry 3]:

Chiral **7na** (2% ee) [Table S1, entry 4]:

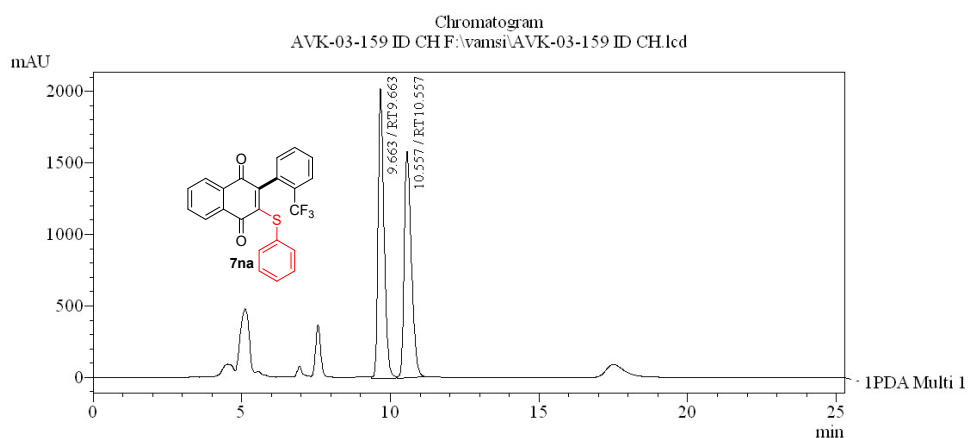

Chiralpak ID, Hexane/*i*-PrOH = 90:10, mL/Min, Flow Rate 1.0 mL/min,

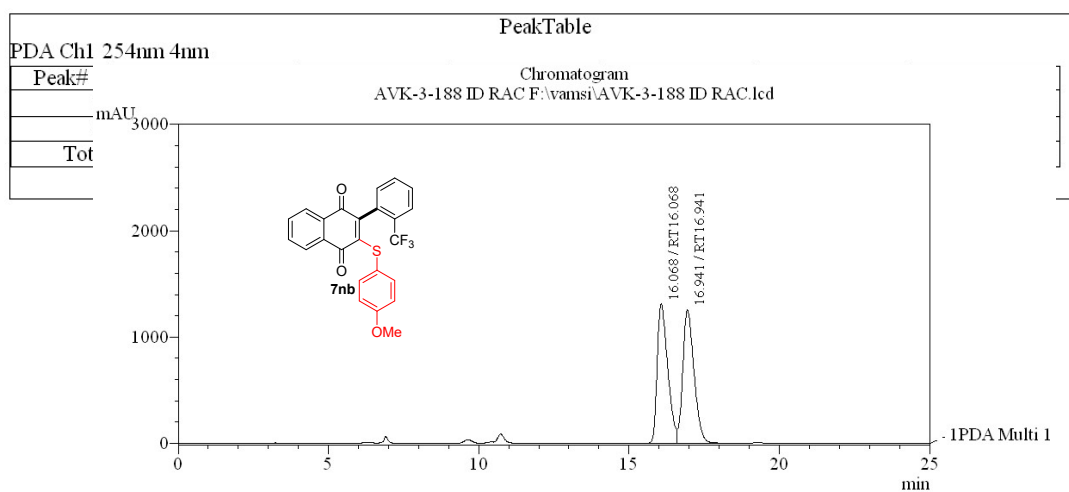

Racemic

Chiralpak ID, Hexane/*i*-PrOH = 90:10, mL/Min, Flow Rate 1.0 mL/min,

(±)-**7nb**:

| PeakTable         |          |           |          |         |         |          |
|-------------------|----------|-----------|----------|---------|---------|----------|
| PDA Ch1 254nm 4nm |          |           |          |         |         |          |
| Peak#             | Name     | Ret. Time | Area     | Height  | Area %  | Height % |
| 1                 | RT16.068 | 16.068    | 31951879 | 1310647 | 49.316  | 51.076   |
| 2                 | RT16.941 | 16.941    | 32837559 | 1255442 | 50.684  | 48.924   |
| Total             |          |           | 64789438 | 2566089 | 100.000 | 100.000  |

Racemic ( $\pm$ )-7qa:

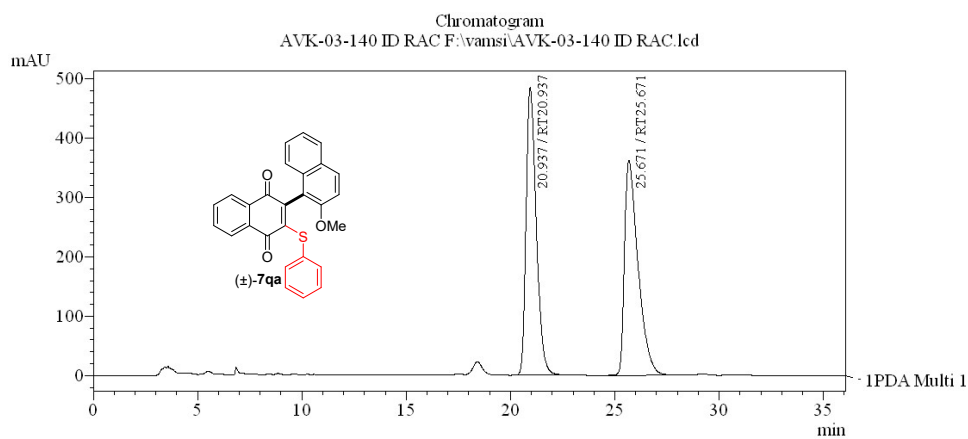

Chiralpak ID, Hexane/*i*-PrOH = 90:10, mL/Min, Flow Rate 1.0 mL/min,

| PeakTable |          |           |          |        |         |          |
|-----------|----------|-----------|----------|--------|---------|----------|
| Peak#     | Name     | Ret. Time | Area     | Height | Area %  | Height % |
| 1         | RT20.937 | 20.937    | 16446164 | 485143 | 50.122  | 57.242   |
| 2         | RT25.671 | 25.671    | 16366176 | 362392 | 49.878  | 42.758   |
| Total     |          |           | 32812340 | 847535 | 100.000 | 100.000  |

Racemic ( $\pm$ )-**10a**:

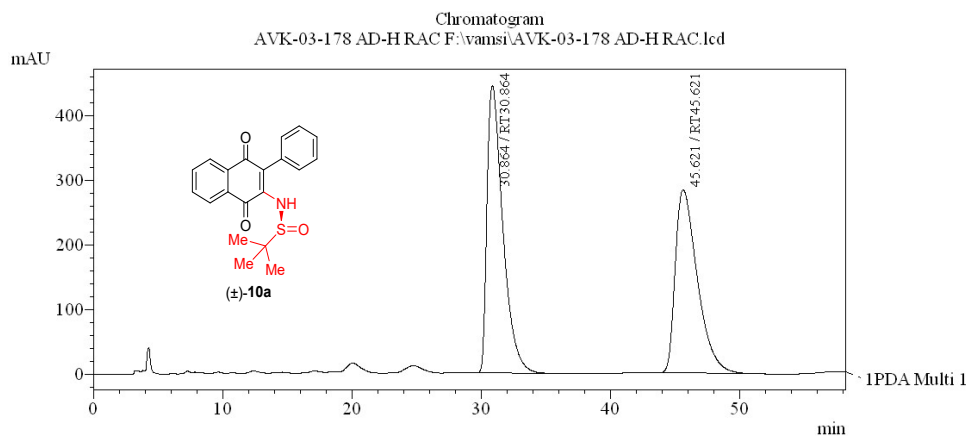

Chiralpak AD-H, Hexane/*i*-PrOH = 90:10, mL/Min, Flow Rate 1.0

| PeakTable |          |           |          |        |         |          |
|-----------|----------|-----------|----------|--------|---------|----------|
| Peak#     | Name     | Ret. Time | Area     | Height | Area %  | Height % |
| 1         | RT30.864 | 30.864    | 37868786 | 445101 | 52.812  | 61.043   |
| 2         | RT45.621 | 45.621    | 33835855 | 284062 | 47.188  | 38.957   |
| Total     |          |           | 71704642 | 729163 | 100.000 | 100.000  |

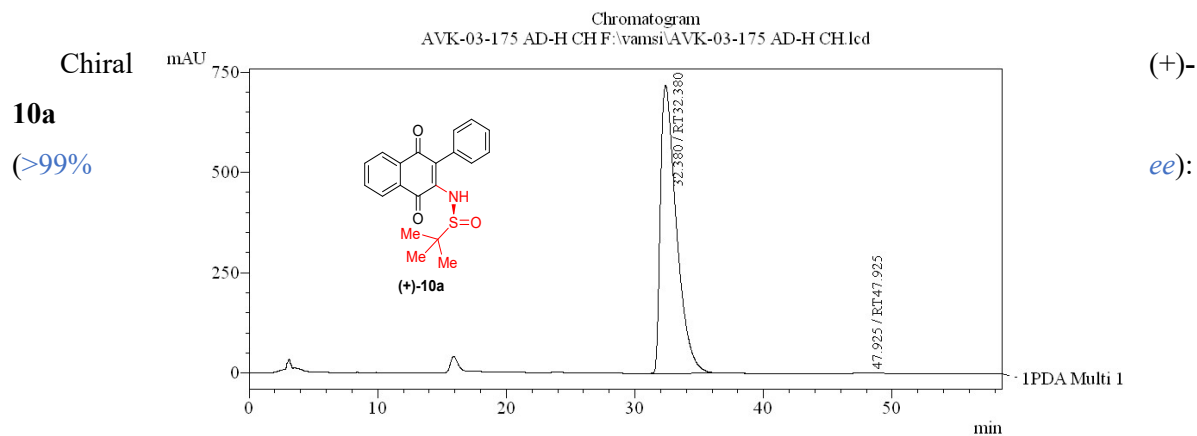

Chiralpak AD-H, Hexane/*i*-PrOH = 90:10, mL/Min, Flow Rate 1.0

| PeakTable |          |           |          |        |         |          |
|-----------|----------|-----------|----------|--------|---------|----------|
| Peak#     | Name     | Ret. Time | Area     | Height | Area %  | Height % |
| 1         | RT32.380 | 32.380    | 62181933 | 717156 | 99.787  | 99.768   |
| 2         | RT47.925 | 47.925    | 132891   | 1665   | 0.213   | 0.232    |
| Total     |          |           | 62314824 | 718820 | 100.000 | 100.000  |

Chiral (-)-**10a** (>99% ee):

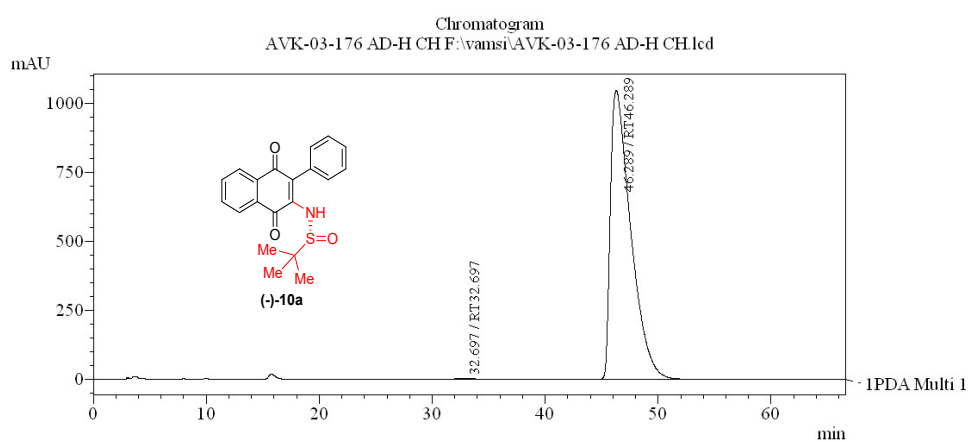

Chiralpak AD-H, Hexane/*i*-PrOH = 90:10, mL/Min, Flow Rate 1.0

| PeakTable |          |           |           |         |         |          |
|-----------|----------|-----------|-----------|---------|---------|----------|
| Peak#     | Name     | Ret. Time | Area      | Height  | Area %  | Height % |
| 1         | RT32.697 | 32.697    | 244402    | 3471    | 0.187   | 0.331    |
| 2         | RT46.289 | 46.289    | 130575989 | 1045182 | 99.813  | 99.669   |
| Total     |          |           | 130820391 | 1048653 | 100.000 | 100.000  |

Racemic ( $\pm$ )-**10h**:

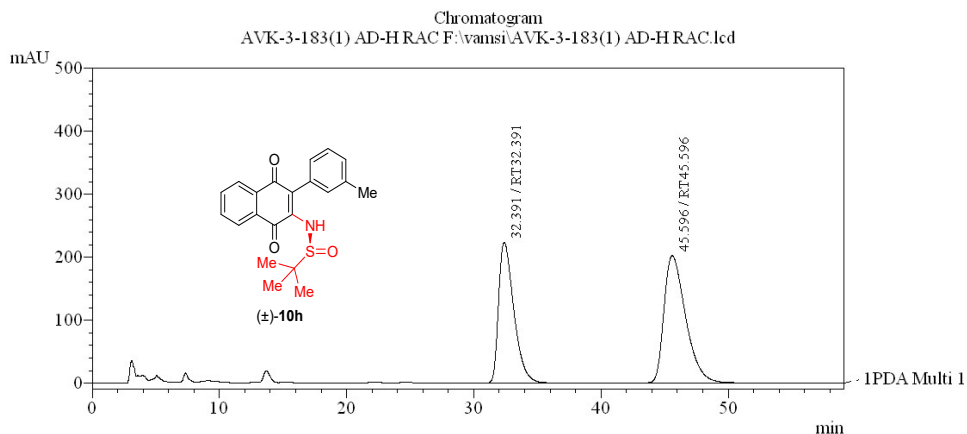

Chiralpak AD-H, Hexane/*i*-PrOH = 90:10, mL/Min, Flow Rate 1.0

| PeakTable         |          |           |          |        |         |          |
|-------------------|----------|-----------|----------|--------|---------|----------|
| PDA Ch1 254nm 4nm |          |           |          |        |         |          |
| Peak#             | Name     | Ret. Time | Area     | Height | Area %  | Height % |
| 1                 | RT32.391 | 32.391    | 18523697 | 223563 | 43.845  | 52.558   |
| 2                 | RT45.596 | 45.596    | 23724710 | 201800 | 56.155  | 47.442   |
| Total             |          |           | 42248407 | 425363 | 100.000 | 100.000  |

Chiral (+)-10h (>99% ee):

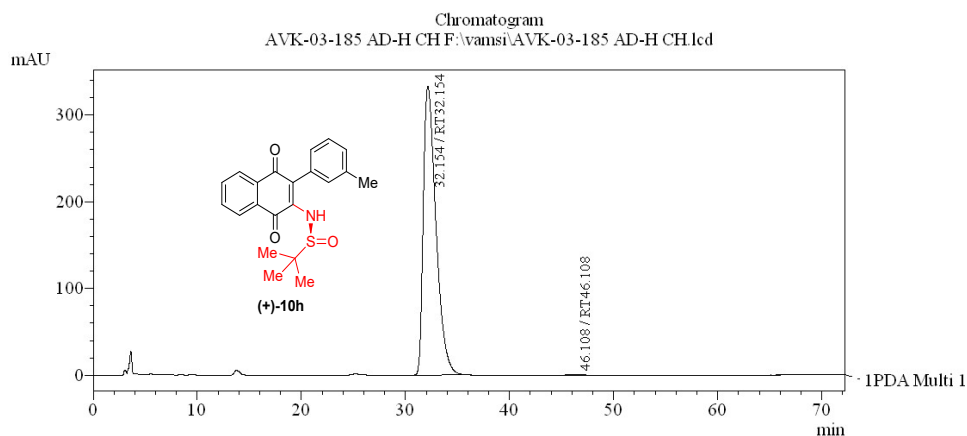

Chiralpak AD-H, Hexane/*i*-PrOH = 90:10, mL/Min, Flow Rate 1.0

| PeakTable         |          |           |          |        |         |          |
|-------------------|----------|-----------|----------|--------|---------|----------|
| PDA Ch1 254nm 4nm |          |           |          |        |         |          |
| Peak#             | Name     | Ret. Time | Area     | Height | Area %  | Height % |
| 1                 | RT32.154 | 32.154    | 28067308 | 332796 | 99.825  | 99.857   |
| 2                 | RT46.108 | 46.108    | 49334    | 477    | 0.175   | 0.143    |
| Total             |          |           | 28116642 | 333273 | 100.000 | 100.000  |



Chiral (-)-**10h** (>99% ee):

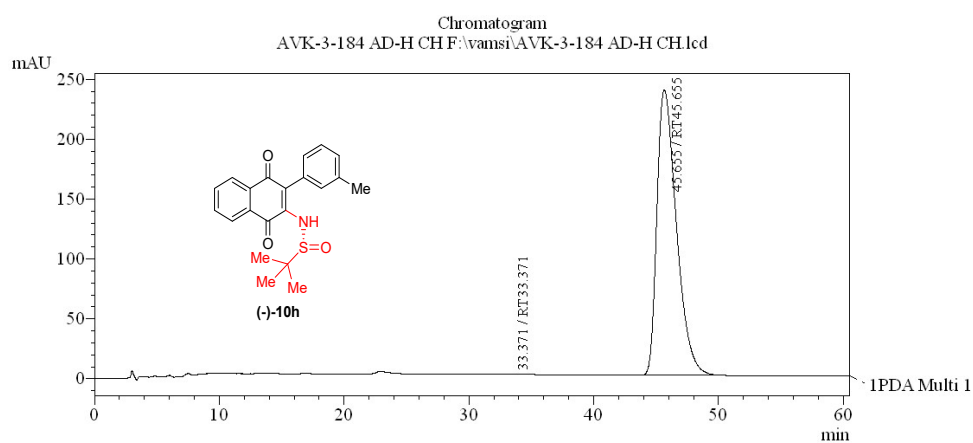

Chiralpak AD-H, Hexane/*i*-PrOH = 90:10, mL/Min, Flow Rate 1.0

| PeakTable         |          |           |          |        |         |          |  |
|-------------------|----------|-----------|----------|--------|---------|----------|--|
| PDA Ch1 254nm 4nm |          |           |          |        |         |          |  |
| Peak#             | Name     | Ret. Time | Area     | Height | Area %  | Height % |  |
| 1                 | RT33.371 | 33.371    | 32449    | 432    | 0.125   | 0.181    |  |
| 2                 | RT45.655 | 45.655    | 25853392 | 238156 | 99.875  | 99.819   |  |
| Total             |          |           | 25885840 | 238588 | 100.000 | 100.000  |  |
